# Supplementary material
Source: PubMed Central journal article supplement (PMC7791963)

**Supplementary table 1. Primers sequences and thermocycling conditions**

|                         | Primers                                                                                                                                                             | PCR                                                                                                                                                                                                                                                | Cycling                                                                       | Ramp Rate                                                                                     |
|-------------------------|---------------------------------------------------------------------------------------------------------------------------------------------------------------------|----------------------------------------------------------------------------------------------------------------------------------------------------------------------------------------------------------------------------------------------------|-------------------------------------------------------------------------------|-----------------------------------------------------------------------------------------------|
| RP-PCR                  | NBF19-R: 5'-AGCGCCCACAGCAGAGCGGC-3'<br>pGEX3'-(CGG) <sub>5</sub> : 5'-CCGGGAGCTGCATGTGTCAGAGG(CGG) <sub>5</sub> -3'<br>Fam-pGEX3': 5-FAM-CCGGGAGCTGCATGTGTCAGAGG-3' | Takara LA taq 1.25units<br>2X GC buffer II 12.5μl<br>dCTP/dTTP/dATP (2.5mM) 4μl<br>7 deaza-dGTP (2.5mM) 4μl<br>Primers: 180nmol/μl for NBF19-R and fam-pGEX3';<br>9nmol/μl for pGEX3'-(CGG) <sub>5</sub><br>gDNA 100ng<br>H <sub>2</sub> O to 25μl | 95°C 5mins<br>[95°C 30s,<br>98°C 10s,<br>62°C 30s,<br>72°C 2mins] X 50<br>4°C | 2.5°Cs <sup>-1</sup><br>2.5°Cs <sup>-1</sup><br>-1.5°Cs <sup>-1</sup><br>2.5°Cs <sup>-1</sup> |
| PCR for Fragment Sizing | NBPF19-5R2: 5'-TACTCACCATGCGCGGGGGT-3'<br>pGEX3'-NBPF19-6F: 5'-CCGGGAGCTGCATGTGTCAGAGGGCCTGTGCTTCGGAC-3'<br>fam-pGEC3': 5'-FAM-CCGGGAGCTGCATGTGTCAGAGG-3'           | Takara LA taq 1.25units<br>2X GC buffer II 12.5μl<br>dNTP (2.5mM) 4μl<br>Primers: 180nmol/μl each<br>gDNA 100ng<br>H <sub>2</sub> O to 25μl                                                                                                        | 98°C 1min<br>[98°C 10s,<br>58°C 30s,<br>68°C 30s] X 35<br>4°C                 | n/a                                                                                           |

RP-PCR Repeat Primed PCR, 7 deaza-dGTP 7-Deaza-2'-deoxyguanosine-5'triphosphates, dATP deoxyadenosine triphosphates, dATP deoxycytidine triphosphates, dTTP deoxythymidine triphosphates, dNTP deoxynucleotide triphosphates, gDNA genomic DNA

## Supplementary materials

Supplementary figure 1. (A, C) Representative electropherograms of RP-PCR analysis in a positive control shows a characteristic sawtooth appearance as compared to a patient without the expansion. (B, D) Fragment analysis of a positive control only captured one non-expanded allele (~19 GGC repeats). In contrast, two alleles were captured in a patient in our UK cohort (~15/28 GGC repeats).

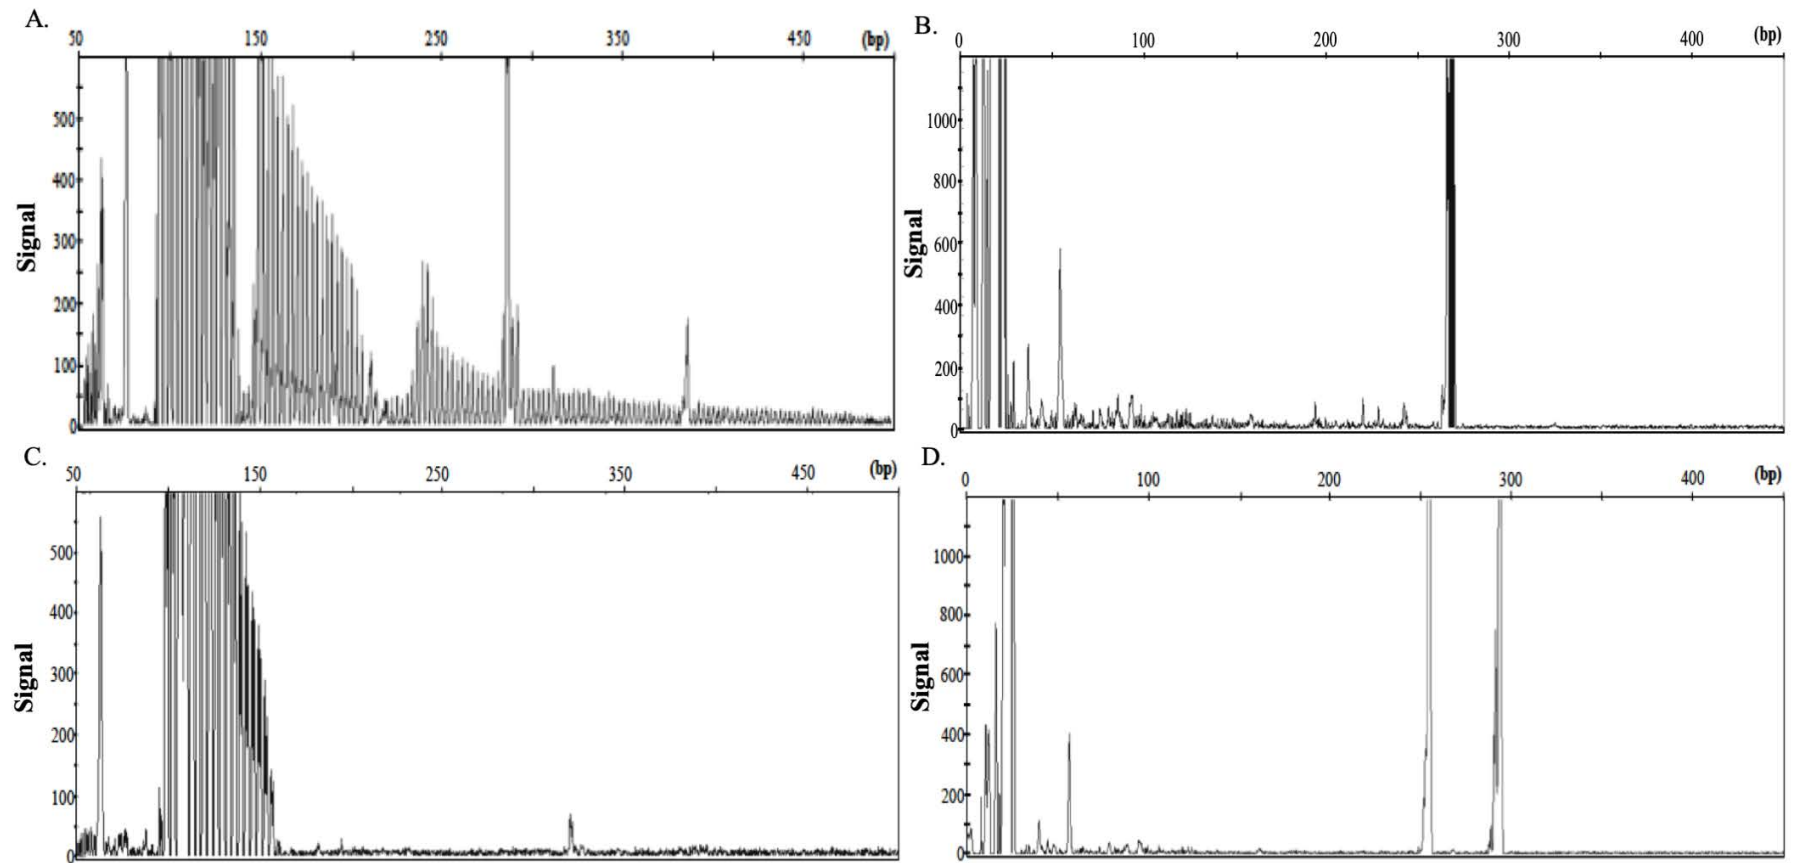

Supplement: awaa144_supplementary_data.pdf [file awaa144_supplementary_data.pdf]
